# Supplementary material for: Effects of β-Glucan Supplementation on LPS-Induced Endotoxemia in Horses
Source: MDPI journal article supplement (doi:10.3390/ani14030474), 2024-01-31
Supplement: s1 [file s1]

### Analyte TNFa

Y = Linear( {1.36, 3.5}, {8.29, 8.5})

Chi=, CV=, R2=1.00, DC=(, +∞)

| Expected<br>pg/mL (i) | MFI(i) | MFI    | CV    | pg/mL(i) | pg/mL | Recovery |
|-----------------------|--------|--------|-------|----------|-------|----------|
| 0                     | 12     | 12     |       | 0,41     | 0.41  |          |
|                       | 13     |        |       | 0,49     |       |          |
| 3.91                  | 34.5   | 33     |       | 4,32     | 3.91  | 100 %    |
|                       | 33     |        |       | 3,91     |       |          |
| 15.62                 | 62.5   | 61.25  | 2.89% | 16       | 15.62 | 100 %    |
|                       | 60     |        |       | 14,91    |       |          |
| 62.5                  | 202    | 197.75 | 3.04% | 64,08    | 62.5  | 100 %    |
|                       | 193.5  |        |       | 60,91    |       |          |
| 250                   | 625    | 646    | 4.6%  | 241      | 250   | 100 %    |
|                       | 667    |        |       | 259      |       |          |
| 1000                  | 2375   | 2295   | 4.93% | 1065     | 1000  | 100 %    |
|                       | 2215   |        |       | 962      |       |          |
| 4000                  | 4862   | 4898.5 | 1.05% | 3946     | 4000  | 100 %    |
|                       | 4935   |        |       | 4055     |       |          |

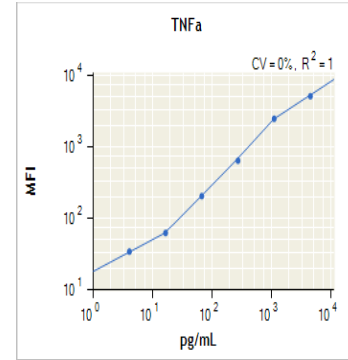

Samples:

| Sample   | MFI(i) | MFI   | CV    | pg/mL(i) | pg/mL |
|----------|--------|-------|-------|----------|-------|
| Control1 | 51.5   | 54.75 | 8.39% | 10,59    | 12.15 |
|          | 58     |       |       | 13,82    |       |
| Control2 | 328    | 322.5 | 2.41% | 113      | 111   |
|          | 317    |       |       | 109      |       |
| 1        | 22.5   | 22.5  |       | 1,66     | 1.66  |

|    |        |        |       |       |
|----|--------|--------|-------|-------|
| 3  | 2115   | 2115   | 915   | 915   |
| 4  | 3288   | 3288   | 1930  | 1930  |
| 5  | 4185   | 4185   | 3000  | 3000  |
| 6  | 3624   | 3624   | 2305  | 2305  |
| 7  | 1704   | 1704   | 722   | 722   |
| 8  | 572    | 572    | 217   | 217   |
| 9  | 174    | 174    | 53,72 | 53.72 |
| 10 | 59     | 59     | 14,36 | 14.36 |
| 13 | 36     | 36     | 4,75  | 4.75  |
| 14 | 25.5   | 25.5   | 2,19  | 2.19  |
| 16 | 1229.5 | 1229.5 | 505   | 505   |
| 17 | 4238.5 | 4238.5 | 3070  | 3070  |
| 18 | 4549   | 4549   | 3494  | 3494  |
| 19 | 5003.5 | 5003.5 | 4158  | 4158  |
| 20 | 3316.5 | 3316.5 | 1960  | 1960  |
| 21 | 1279.5 | 1279.5 | 528   | 528   |
| 22 | 223    | 223    | 71,94 | 71.94 |
| 23 | 75     | 75     | 19,85 | 19.85 |
| 26 | 33     | 33     | 3,91  | 3.91  |
| 27 | 25     | 25     | 2,1   | 2.1   |
| 29 | 26     | 26     | 2,29  | 2.29  |
| 30 | 994    | 994    | 401   | 401   |
| 31 | 2295   | 2295   | 1000  | 1000  |
| 32 | 5410.5 | 5410.5 | 4797  | 4797  |
| 33 | 4818   | 4818   | 3881  | 3881  |
| 34 | 3836   | 3836   | 2558  | 2558  |

|    |        |        |       |       |
|----|--------|--------|-------|-------|
| 35 | 1942   | 1942   | 833   | 833   |
| 36 | 238    | 238    | 77,64 | 77.64 |
| 39 | 30.5   | 30.5   | 3,28  | 3.28  |
| 40 | 100    | 100    | 27,9  | 27.9  |
| 42 | 136.5  | 136.5  | 40,31 | 40.31 |
| 43 | 514    | 514    | 191   | 191   |
| 44 | 4592   | 4592   | 3554  | 3554  |
| 45 | 4941.5 | 4941.5 | 4064  | 4064  |
| 46 | 4171   | 4171   | 2981  | 2981  |
| 47 | 2334   | 2334   | 1031  | 1031  |
| 48 | 656    | 656    | 254   | 254   |
| 49 | 171    | 171    | 52,63 | 52.63 |
| 52 | 26     | 26     | 2,29  | 2.29  |
| 53 | 22     | 22     | 1,58  | 1.58  |
| 55 | 41     | 41     | 6,36  | 6.36  |
| 56 | 27     | 27     | 2,49  | 2.49  |
| 57 | 111    | 111    | 31,56 | 31.56 |
| 58 | 4183.5 | 4183.5 | 2998  | 2998  |
| 59 | 2294   | 2294   | 1000  | 1000  |
| 60 | 848.5  | 848.5  | 337   | 337   |
| 61 | 179    | 179    | 55,55 | 55.55 |
| 62 | 37     | 37     | 5,05  | 5.05  |
| 65 | 24     | 24     | 1,92  | 1.92  |
| 66 | 20.5   | 20.5   | 1,35  | 1.35  |
| 68 | 22     | 22     | 1,58  | 1.58  |
| 69 | 26     | 26     | 2,29  | 2.29  |

|     |        |        |       |       |
|-----|--------|--------|-------|-------|
| 70  | 1188   | 1188   | 487   | 487   |
| 71  | 3577.5 | 3577.5 | 2252  | 2252  |
| 72  | 2349.5 | 2349.5 | 1044  | 1044  |
| 73  | 528.5  | 528.5  | 198   | 198   |
| 74  | 208    | 208    | 66,31 | 66.31 |
| 75  | 151    | 151    | 45,43 | 45.43 |
| 78  | 222    | 222    | 71,57 | 71.57 |
| 79  | 52.5   | 52.5   | 11,06 | 11.06 |
| 81  | 53     | 53     | 11,3  | 11.3  |
| 83  | 1885   | 1885   | 806   | 806   |
| 84  | 2342   | 2342   | 1038  | 1038  |
| 85  | 2433.5 | 2433.5 | 1113  | 1113  |
| 86  | 431    | 431    | 156   | 156   |
| 87  | 132.5  | 132.5  | 38,92 | 38.92 |
| 88  | 74     | 74     | 19,54 | 19.54 |
| 91  | 39     | 39     | 5,68  | 5.68  |
| 92  | 35     | 35     | 4,46  | 4.46  |
| 94  | 131    | 131    | 38,4  | 38.4  |
| 96  | 1816   | 1816   | 774   | 774   |
| 97  | 1588   | 1588   | 669   | 669   |
| 98  | 1418   | 1418   | 591   | 591   |
| 99  | 452    | 452    | 165   | 165   |
| 100 | 95     | 95     | 26,25 | 26.25 |
| 101 | 91     | 91     | 24,95 | 24.95 |
| 104 | 65     | 65     | 16,76 | 16.76 |

Notes: Red-Above range, Black-Below range, Blue-In range
