# Supplementary material for: Effects of β-Glucan Supplementation on LPS-Induced Endotoxemia in Horses
Source: MDPI journal article supplement (doi:10.3390/ani14030474), 2024-01-31
Supplement: s1 [file s1]

### Analyte IL-10

Four-parameter.log(3.57, 8.55, 0.80, 7.16)

Chi=9.76%, CV=1.91%, R2=1.00, DC=(4.98, 89107.53)

| Expected<br>pg/mL (i) | MFI(i) | MFI     | CV    | pg/mL(i) | pg/mL | Recovery |
|-----------------------|--------|---------|-------|----------|-------|----------|
| 0                     | 16.5   | 17      | 4.16% | 0        | 0     |          |
|                       | 17.5   |         |       | 0        |       |          |
| 48.83                 | 50     | 50      |       | 48,56    | 48.56 | 99 %     |
|                       | 50     |         |       | 48,56    |       |          |
| 195                   | 91     | 91      |       | 206      | 206   | 106 %    |
|                       | 97     |         |       | 229      |       |          |
| 781                   | 235    | 235     |       | 691      | 691   | 89 %     |
|                       | 234    |         |       | 679      |       |          |
| 3125                  | 1197   | 1152.5  |       | 3826     | 3656  | 117 %    |
|                       | 1152.5 |         |       | 3656     |       |          |
| 12500                 | 2484   | 2479.5  | 0.26% | 11451    | 11410 | 91 %     |
|                       | 2475   |         |       | 11369    |       |          |
| 50000                 | 3966.5 | 4041.75 | 2.63% | 45986    | 50591 | 101 %    |
|                       | 4117   |         |       | 55942    |       |          |

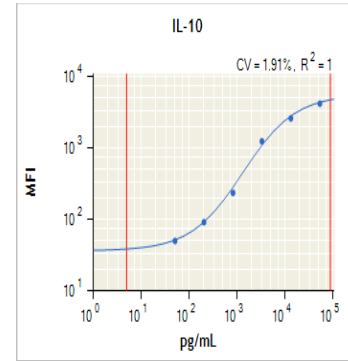

Samples:

| Sample   | MFI(i) | MFI    | CV    | pg/mL(i) | pg/mL |
|----------|--------|--------|-------|----------|-------|
| Control1 | 108.5  | 109.25 | 0.97% | 271      | 273   |
|          | 110    |        |       | 276      |       |
| Control2 | 773    | 776.5  | 0.64% | 2338     | 2350  |
|          | 780    |        |       | 2361     |       |
| 1        | 64     | 64     |       | 103      | 103   |

|    |       |       |       |       |
|----|-------|-------|-------|-------|
| 3  | 103   | 103   | 251   | 251   |
| 4  | 133   | 133   | 357   | 357   |
| 5  | 164   | 164   | 462   | 462   |
| 6  | 313.5 | 313.5 | 933   | 933   |
| 7  | 221   | 221   | 647   | 647   |
| 8  | 316   | 316   | 940   | 940   |
| 9  | 428   | 428   | 1277  | 1277  |
| 10 | 333.5 | 333.5 | 993   | 993   |
| 13 | 128.5 | 128.5 | 341   | 341   |
| 14 | 64    | 64    | 103   | 103   |
| 16 | 123   | 123   | 322   | 322   |
| 17 | 161.5 | 161.5 | 454   | 454   |
| 18 | 122.5 | 122.5 | 320   | 320   |
| 19 | 295   | 295   | 877   | 877   |
| 20 | 306   | 306   | 910   | 910   |
| 21 | 316   | 316   | 940   | 940   |
| 22 | 433.5 | 433.5 | 1294  | 1294  |
| 23 | 368   | 368   | 1097  | 1097  |
| 26 | 83.5  | 83.5  | 178   | 178   |
| 27 | 51    | 51    | 52,43 | 52.43 |
| 29 | 48    | 48    | 40,9  | 40.9  |
| 30 | 837   | 837   | 2546  | 2546  |
| 31 | 64    | 64    | 103   | 103   |
| 32 | 100   | 100   | 240   | 240   |
| 33 | 202.5 | 202.5 | 588   | 588   |
| 34 | 168   | 168   | 476   | 476   |

|    |       |       |       |       |
|----|-------|-------|-------|-------|
| 35 | 235   | 235   | 691   | 691   |
| 36 | 283   | 283   | 840   | 840   |
| 39 | 94    | 94    | 218   | 218   |
| 40 | 149   | 149   | 412   | 412   |
| 42 | 53.5  | 53.5  | 62,13 | 62.13 |
| 43 | 71    | 71    | 130   | 130   |
| 44 | 121   | 121   | 315   | 315   |
| 45 | 151   | 151   | 419   | 419   |
| 46 | 238   | 238   | 701   | 701   |
| 47 | 345   | 345   | 1028  | 1028  |
| 48 | 423.5 | 423.5 | 1264  | 1264  |
| 49 | 423   | 423   | 1262  | 1262  |
| 52 | 85    | 85    | 184   | 184   |
| 53 | 45.5  | 45.5  | 31,47 | 31.47 |
| 55 | 42    | 42    | 18,73 | 18.73 |
| 56 | 39    | 39    | 8,65  | 8.65  |
| 57 | 45    | 45    | 29,61 | 29.61 |
| 58 | 99    | 99    | 236   | 236   |
| 59 | 184   | 184   | 528   | 528   |
| 60 | 248   | 248   | 732   | 732   |
| 61 | 229   | 229   | 672   | 672   |
| 62 | 175.5 | 175.5 | 500   | 500   |
| 65 | 79    | 79    | 161   | 161   |
| 66 | 47    | 47    | 37,1  | 37.1  |
| 68 | 45    | 45    | 29,61 | 29.61 |
| 69 | 42.5  | 42.5  | 20,51 | 20.51 |

|     |       |       |      |      |
|-----|-------|-------|------|------|
| 70  | 48    | 48    | 40,9 | 40,9 |
| 71  | 119   | 119   | 308  | 308  |
| 72  | 117   | 117   | 301  | 301  |
| 73  | 146.5 | 146.5 | 403  | 403  |
| 74  | 215   | 215   | 628  | 628  |
| 75  | 150   | 150   | 415  | 415  |
| 78  | 123.5 | 123.5 | 324  | 324  |
| 79  | 117   | 117   | 301  | 301  |
| 81  | 121   | 121   | 315  | 315  |
| 83  | 165.5 | 165.5 | 467  | 467  |
| 84  | 87    | 87    | 191  | 191  |
| 85  | 369.5 | 369.5 | 1102 | 1102 |
| 86  | 276   | 276   | 818  | 818  |
| 87  | 243.5 | 243.5 | 718  | 718  |
| 88  | 290   | 290   | 861  | 861  |
| 91  | 121   | 121   | 315  | 315  |
| 92  | 57    | 57    | 75,8 | 75,8 |
| 94  | 178   | 178   | 509  | 509  |
| 96  | 155.5 | 155.5 | 434  | 434  |
| 97  | 288   | 288   | 855  | 855  |
| 98  | 233.5 | 233.5 | 686  | 686  |
| 99  | 308   | 308   | 916  | 916  |
| 100 | 215   | 215   | 628  | 628  |
| 101 | 396   | 396   | 1181 | 1181 |
| 104 | 171.5 | 171.5 | 487  | 487  |

Notes: Red-Above range, Black-Below range, Blue-In range
