# Supplementary material for: Effects of β-Glucan Supplementation on LPS-Induced Endotoxemia in Horses
Source: MDPI journal article supplement (doi:10.3390/ani14030474), 2024-01-31
Supplement: s1 [file s1]

### Analyte IL-6

Four-parameter.log(2.74, 9.03, 0.54, 6.12)

Chi=8.17%, CV=1.24%, R2=1.00, DC=(1.17, 45074.55)

| Expected<br>pg/mL (i) | MFI(i) | MFI    | CV    | pg/mL(i) | pg/mL | Recovery |
|-----------------------|--------|--------|-------|----------|-------|----------|
| 0                     | 15.5   | 14.75  | 7.19% | 0        | 0     |          |
|                       | 14     |        |       | 0        |       |          |
| 14.65                 | 38     | 36     |       | 16,7     | 14.62 | 100 %    |
|                       | 36     |        |       | 14,62    |       |          |
| 58.59                 | 71.5   | 74.5   | 5.69% | 56,19    | 59.96 | 102 %    |
|                       | 77.5   |        |       | 63,76    |       |          |
| 234                   | 196    | 191.75 | 3.13% | 222      | 216   | 92 %     |
|                       | 187.5  |        |       | 210      |       |          |
| 938                   | 718    | 735.25 | 3.32% | 1045     | 1076  | 115 %    |
|                       | 752.5  |        |       | 1108     |       |          |
| 3750                  | 1719   | 1690   | 2.43% | 3444     | 3354  | 89 %     |
|                       | 1661   |        |       | 3265     |       |          |
| 15000                 | 3679   | 3679   |       | 15331    | 15331 | 102 %    |
|                       | 3679   |        |       | 15331    |       |          |

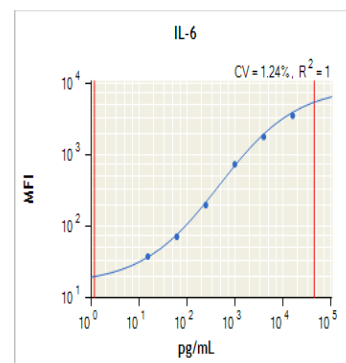

Samples:

| Sample   | MFI(i) | MFI    | CV    | pg/mL(i) | pg/mL |
|----------|--------|--------|-------|----------|-------|
| Control1 | 99.5   | 99.25  | 0.36% | 92,08    | 91.76 |
|          | 99     |        |       | 91,43    |       |
| Control2 | 618    | 611.25 | 1.56% | 870      | 858   |
|          | 604.5  |        |       | 847      |       |
| 1        | 24     | 24     |       | 3,83     | 3.83  |

|    |       |       |       |       |
|----|-------|-------|-------|-------|
| 3  | 25    | 25    | 4,58  | 4.58  |
| 4  | 34.5  | 34.5  | 13,1  | 13.1  |
| 5  | 38    | 38    | 16,7  | 16.7  |
| 6  | 60    | 60    | 41,99 | 41.99 |
| 7  | 76    | 76    | 61,86 | 61.86 |
| 8  | 159   | 159   | 171   | 171   |
| 9  | 108   | 108   | 103   | 103   |
| 10 | 51.5  | 51.5  | 31,83 | 31.83 |
| 13 | 28    | 28    | 7,01  | 7.01  |
| 14 | 21    | 21    | 1,89  | 1.89  |
| 16 | 26    | 26    | 5,35  | 5.35  |
| 17 | 37    | 37    | 15,65 | 15.65 |
| 18 | 42    | 42    | 21,01 | 21.01 |
| 19 | 142   | 142   | 148   | 148   |
| 20 | 163   | 163   | 177   | 177   |
| 21 | 262   | 262   | 315   | 315   |
| 22 | 205   | 205   | 235   | 235   |
| 23 | 150.5 | 150.5 | 160   | 160   |
| 26 | 33    | 33    | 11,62 | 11.62 |
| 27 | 22    | 22    | 2,48  | 2.48  |
| 29 | 23    | 23    | 3,14  | 3.14  |
| 30 | 758   | 758   | 1118  | 1118  |
| 31 | 28.5  | 28.5  | 7,45  | 7.45  |
| 32 | 69.5  | 69.5  | 53,69 | 53.69 |
| 33 | 154   | 154   | 165   | 165   |
| 34 | 375.5 | 375.5 | 481   | 481   |

|    |       |       |       |       |
|----|-------|-------|-------|-------|
| 35 | 421   | 421   | 551   | 551   |
| 36 | 343   | 343   | 433   | 433   |
| 39 | 109   | 109   | 105   | 105   |
| 40 | 102.5 | 102.5 | 96    | 96    |
| 42 | 22    | 22    | 2,48  | 2.48  |
| 43 | 23    | 23    | 3,14  | 3.14  |
| 44 | 32.5  | 32.5  | 11,13 | 11.13 |
| 45 | 73.5  | 73.5  | 58,71 | 58.71 |
| 46 | 128   | 128   | 130   | 130   |
| 47 | 375.5 | 375.5 | 481   | 481   |
| 48 | 326   | 326   | 408   | 408   |
| 49 | 295   | 295   | 362   | 362   |
| 52 | 62    | 62    | 44,42 | 44.42 |
| 53 | 20    | 20    | 1,35  | 1.35  |
| 55 | 23    | 23    | 3,14  | 3.14  |
| 56 | 35    | 35    | 13,6  | 13.6  |
| 57 | 21    | 21    | 1,89  | 1.89  |
| 58 | 29    | 29    | 7,89  | 7.89  |
| 59 | 47    | 47    | 26,61 | 26.61 |
| 60 | 175   | 175   | 193   | 193   |
| 61 | 95    | 95    | 86,23 | 86.23 |
| 62 | 48    | 48    | 27,76 | 27.76 |
| 65 | 25    | 25    | 4,58  | 4.58  |
| 66 | 20    | 20    | 1,35  | 1.35  |
| 68 | 25    | 25    | 4,58  | 4.58  |
| 69 | 23    | 23    | 3,14  | 3.14  |

|     |       |       |       |       |
|-----|-------|-------|-------|-------|
| 70  | 24    | 24    | 3,83  | 3.83  |
| 71  | 73    | 73    | 58,08 | 58.08 |
| 72  | 33    | 33    | 11,62 | 11.62 |
| 73  | 54    | 54    | 34,78 | 34.78 |
| 74  | 67.5  | 67.5  | 51,2  | 51.2  |
| 75  | 36    | 36    | 14,62 | 14.62 |
| 78  | 51    | 51    | 31,24 | 31.24 |
| 79  | 60    | 60    | 41,99 | 41.99 |
| 81  | 61    | 61    | 43,2  | 43.2  |
| 83  | 117   | 117   | 115   | 115   |
| 84  | 58    | 58    | 39,56 | 39.56 |
| 85  | 157   | 157   | 169   | 169   |
| 86  | 141   | 141   | 147   | 147   |
| 87  | 129   | 129   | 131   | 131   |
| 88  | 81    | 81    | 68,21 | 68.21 |
| 91  | 39.5  | 39.5  | 18,29 | 18.29 |
| 92  | 49    | 49    | 28,91 | 28.91 |
| 94  | 163.5 | 163.5 | 178   | 178   |
| 96  | 119   | 119   | 118   | 118   |
| 97  | 127   | 127   | 128   | 128   |
| 98  | 91    | 91    | 81,05 | 81.05 |
| 99  | 130   | 130   | 132   | 132   |
| 100 | 96.5  | 96.5  | 88,18 | 88.18 |
| 101 | 134   | 134   | 138   | 138   |
| 104 | 151   | 151   | 161   | 161   |

Notes: Red-Above range, Black-Below range, Blue-In range
