# Supplementary material for: Effects of β-Glucan Supplementation on LPS-Induced Endotoxemia in Horses
Source: MDPI journal article supplement (doi:10.3390/ani14030474), 2024-01-31
Supplement: s1 [file s1]

### Analyte IL-8

Four-parameter.log(2.62, 8.64, 0.53, 6.69)

Chi=2.86%, CV=0.25%, R2=1.00, DC=(2.10, 835390.10)

| Expected<br>pg/mL (i) | MFI(i) | MFI    | CV    | pg/mL(i) | pg/mL | Recovery |
|-----------------------|--------|--------|-------|----------|-------|----------|
| 0                     | 11     | 10.5   | 6.73% | 0        | 0     |          |
|                       | 10     |        |       | 0        |       |          |
| 58.59                 | 59     | 46     |       | 68,2     | 58.1  | 99 %     |
|                       | 46     |        |       | 58,1     |       |          |
| 234                   | 117.5  | 111.5  |       | 262      | 243   | 104 %    |
|                       | 111.5  |        |       | 243      |       |          |
| 938                   | 295    | 302    |       | 864      | 889   | 95 %     |
|                       | 302    |        |       | 889      |       |          |
| 3750                  | 951.5  | 903.5  | 7.51% | 4163     | 3852  | 103 %    |
|                       | 855.5  |        |       | 3554     |       |          |
| 15000                 | 1949   | 1955   | 0.43% | 14865    | 14964 | 100 %    |
|                       | 1961   |        |       | 15064    |       |          |
| 60000                 | 3210   | 3223.5 | 0.59% | 59005    | 59928 | 100 %    |
|                       | 3237   |        |       | 60869    |       |          |

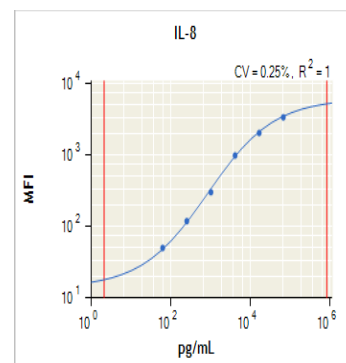

Samples:

| Sample   | MFI(i) | MFI   | CV     | pg/mL(i) | pg/mL |
|----------|--------|-------|--------|----------|-------|
| Control1 | 178    | 164   | 12.07% | 454      | 409   |
|          | 150    |       |        | 364      |       |
| Control2 | 563.5  | 563.5 |        | 1987     | 1987  |
|          | 563.5  |       |        | 1987     |       |
| 1        | 151    | 151   |        | 367      | 367   |

|    |       |       |       |       |
|----|-------|-------|-------|-------|
| 3  | 157.5 | 157.5 | 388   | 388   |
| 4  | 176.5 | 176.5 | 449   | 449   |
| 5  | 147   | 147   | 354   | 354   |
| 6  | 125.5 | 125.5 | 286   | 286   |
| 7  | 149   | 149   | 360   | 360   |
| 8  | 164   | 164   | 409   | 409   |
| 9  | 152   | 152   | 370   | 370   |
| 10 | 141.5 | 141.5 | 336   | 336   |
| 13 | 149   | 149   | 360   | 360   |
| 14 | 73    | 73    | 130   | 130   |
| 16 | 79.5  | 79.5  | 149   | 149   |
| 17 | 75.5  | 75.5  | 137   | 137   |
| 18 | 58    | 58    | 89,14 | 89.14 |
| 19 | 80.5  | 80.5  | 152   | 152   |
| 20 | 70    | 70    | 122   | 122   |
| 21 | 68.5  | 68.5  | 118   | 118   |
| 22 | 71    | 71    | 125   | 125   |
| 23 | 72.5  | 72.5  | 129   | 129   |
| 26 | 74    | 74    | 133   | 133   |
| 27 | 133   | 133   | 310   | 310   |
| 29 | 120   | 120   | 269   | 269   |
| 30 | 709   | 709   | 2717  | 2717  |
| 31 | 120   | 120   | 269   | 269   |
| 32 | 124   | 124   | 282   | 282   |
| 33 | 128   | 128   | 294   | 294   |
| 34 | 122   | 122   | 276   | 276   |

|    |       |       |       |       |
|----|-------|-------|-------|-------|
| 35 | 118   | 118   | 263   | 263   |
| 36 | 106   | 106   | 227   | 227   |
| 39 | 137   | 137   | 322   | 322   |
| 40 | 206.5 | 206.5 | 550   | 550   |
| 42 | 87.5  | 87.5  | 172   | 172   |
| 43 | 99.5  | 99.5  | 207   | 207   |
| 44 | 92    | 92    | 185   | 185   |
| 45 | 84.5  | 84.5  | 163   | 163   |
| 46 | 105   | 105   | 224   | 224   |
| 47 | 172.5 | 172.5 | 436   | 436   |
| 48 | 101   | 101   | 212   | 212   |
| 49 | 189.5 | 189.5 | 493   | 493   |
| 52 | 76    | 76    | 139   | 139   |
| 53 | 60.5  | 60.5  | 95,85 | 95.85 |
| 55 | 65    | 65    | 108   | 108   |
| 56 | 139   | 139   | 329   | 329   |
| 57 | 34    | 34    | 29,89 | 29.89 |
| 58 | 54    | 54    | 78,56 | 78.56 |
| 59 | 61    | 61    | 97,2  | 97.2  |
| 60 | 118   | 118   | 263   | 263   |
| 61 | 53    | 53    | 75,95 | 75.95 |
| 62 | 53    | 53    | 75,95 | 75.95 |
| 65 | 57    | 57    | 86,47 | 86.47 |
| 66 | 46    | 46    | 58,1  | 58.1  |
| 68 | 76    | 76    | 139   | 139   |
| 69 | 80    | 80    | 150   | 150   |

|     |      |      |       |       |
|-----|------|------|-------|-------|
| 70  | 67   | 67   | 114   | 114   |
| 71  | 126  | 126  | 288   | 288   |
| 72  | 53.5 | 53.5 | 77,25 | 77.25 |
| 73  | 61   | 61   | 97,2  | 97.2  |
| 74  | 57   | 57   | 86,47 | 86.47 |
| 75  | 53   | 53   | 75,95 | 75.95 |
| 78  | 51   | 51   | 70,77 | 70.77 |
| 79  | 56   | 56   | 83,82 | 83.82 |
| 81  | 53   | 53   | 75,95 | 75.95 |
| 83  | 116  | 116  | 257   | 257   |
| 84  | 58   | 58   | 89,14 | 89.14 |
| 85  | 54   | 54   | 78,56 | 78.56 |
| 86  | 58.5 | 58.5 | 90,47 | 90.47 |
| 87  | 53   | 53   | 75,95 | 75.95 |
| 88  | 56   | 56   | 83,82 | 83.82 |
| 91  | 47   | 47   | 60,6  | 60.6  |
| 92  | 63.5 | 63.5 | 104   | 104   |
| 94  | 94.5 | 94.5 | 192   | 192   |
| 96  | 60.5 | 60.5 | 95,85 | 95.85 |
| 97  | 53.5 | 53.5 | 77,25 | 77.25 |
| 98  | 47   | 47   | 60,6  | 60.6  |
| 99  | 52.5 | 52.5 | 74,65 | 74.65 |
| 100 | 59.5 | 59.5 | 93,15 | 93.15 |
| 101 | 62   | 62   | 99,9  | 99.9  |
| 104 | 49   | 49   | 65,65 | 65.65 |

Notes: Red-Above range, Black-Below range, Blue-In range
