# Supplementary material for: Effects of β-Glucan Supplementation on LPS-Induced Endotoxemia in Horses
Source: MDPI journal article supplement (doi:10.3390/ani14030474), 2024-01-31
Supplement: s1 [file s1]

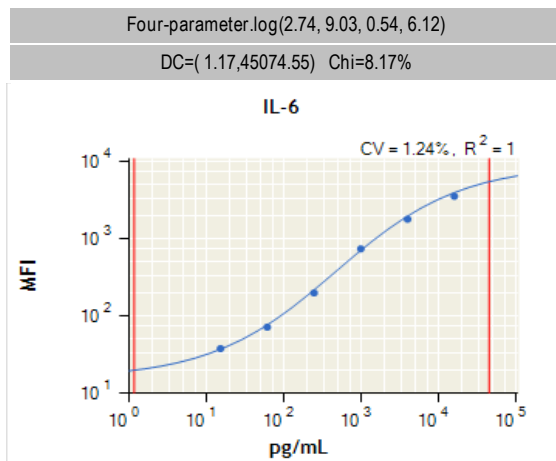

Four-parameter.log(3.57, 8.55, 0.80, 7.16)

DC=( 4.98,89107.53) Chi=9.76%

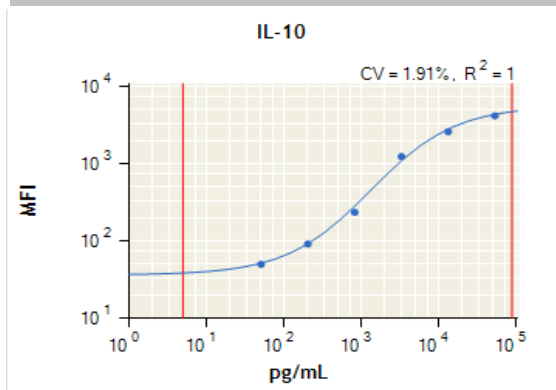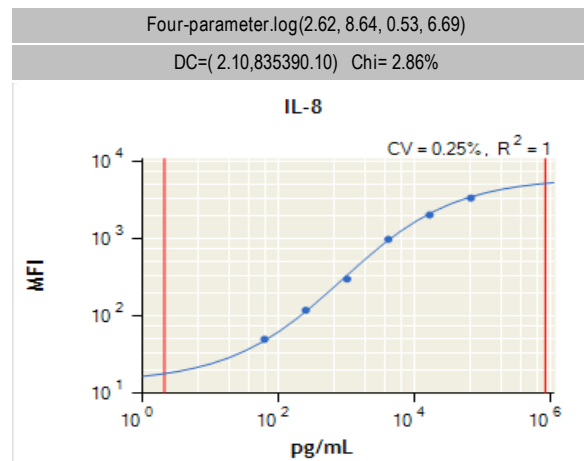

Y = Linear( {1.36, 3.5}, {8.29, 8.5})

DC=( ,+∞) Chi=

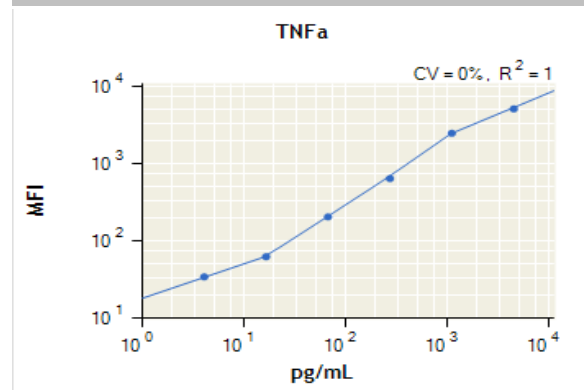

Files Name:

C:\Documents and Settings\Administrator\Desktop\COPY of Brunetto-EQCYTMAG-93K.csv

Chip Model: LINCplex

Application Version: 3.5.5.0

User Name: Administrator

Organization: LEAC-Lab. Especializado em Análises Científicas

**Signature:**
